# Supplementary material for: Ionophore-modified polyaniline-based optode for the determination of hydrogen sulfite levels in beverages, wastewater, and soil
Source: Royal Society of Chemistry journal article supplement (doi:10.1039/d3ay01320k), 2023-01-01
Supplement: d3ay01320k1.pdf [file d3ay01320k1.pdf]

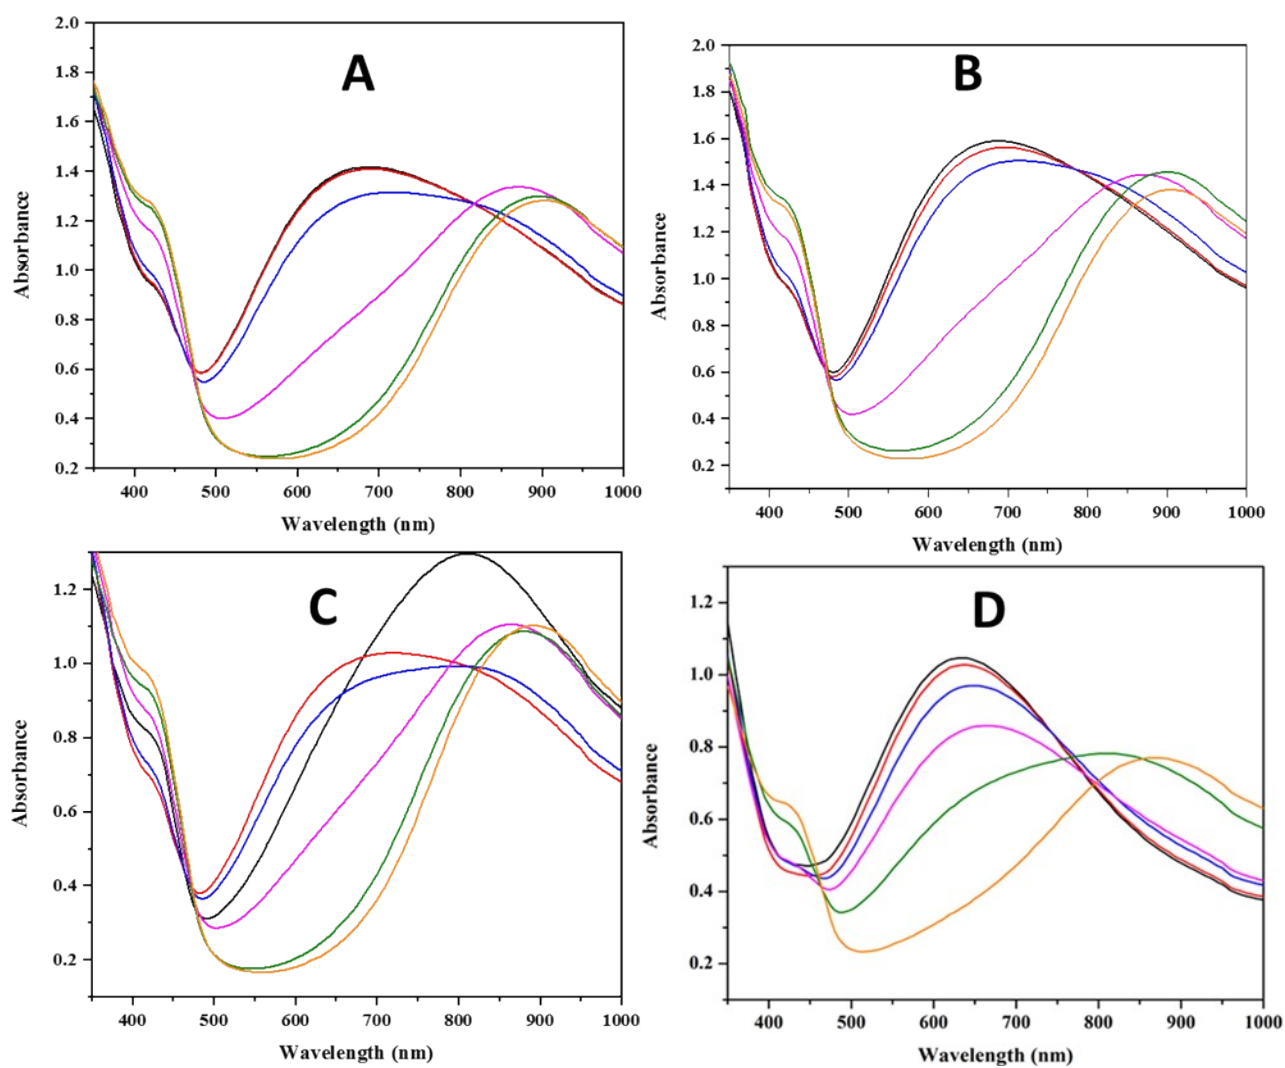

**Fig.S1:** Spectra of the different sensors, (A) sensor 1, (B) sensor 2, (C) sensor 3, and sensor 4 (D); at different concentrations; Black: buffer, red: 10<sup>-5</sup>M, blue: 10<sup>-4</sup>M, pink:10<sup>-3</sup> M, green: 10<sup>-2</sup> M, orange: 10<sup>-1</sup> M

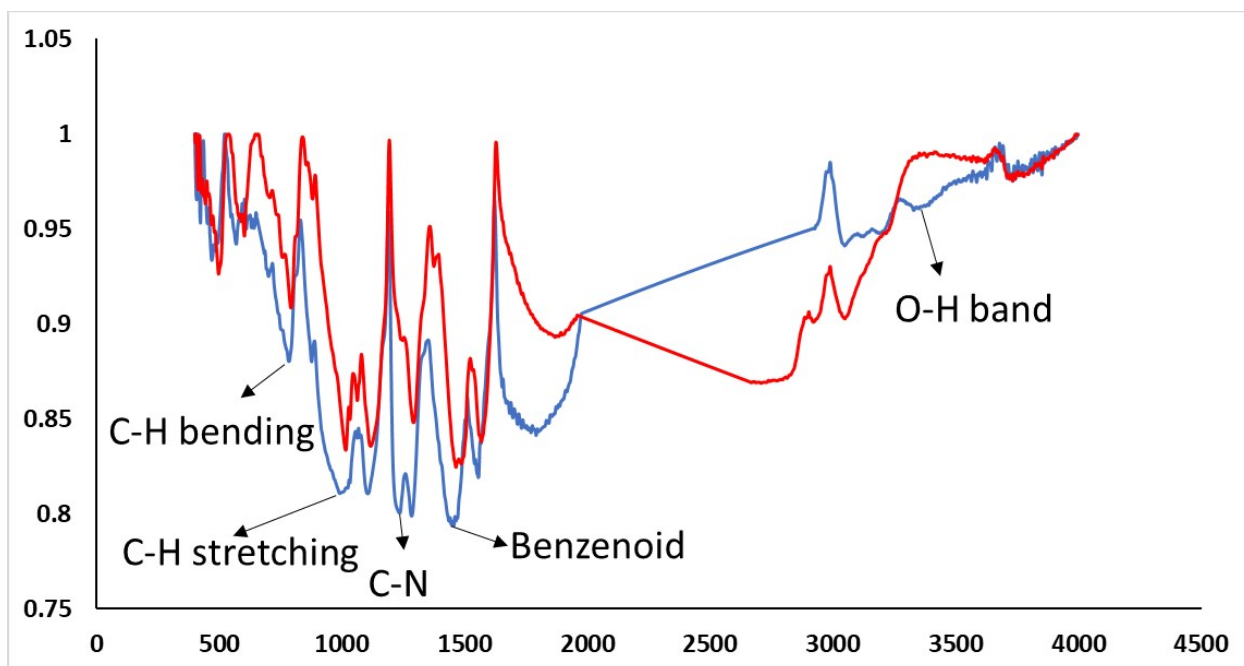

Fig. S2: FTIR of sensor 4 before (blue), and after (red) interaction with sulfite

Table S1: that show ratio between absorbance of sulfite to that of interfering ion at different concentration.

| Conc., M  | iodide   | sulfate  | salicylate | bromide  | nitrate  | sulphide |
|-----------|----------|----------|------------|----------|----------|----------|
| $10^{-5}$ | 1.865209 | 2.211663 | 2.295964   | 2.011788 | 2.579345 | 2.42654  |
| $10^{-4}$ | 1.779817 | 2.117904 | 2.165179   | 1.916996 | 2.455696 | 2.480818 |
| $10^{-3}$ | 1.843011 | 1.917226 | 1.979215   | 1.756148 | 2.137157 | 2.208763 |
| $10^{-2}$ | 1.250923 | 1.641646 | 1.669951   | 1.665848 | 1.629808 | 1.89916  |
